# Supplementary material
Source: Springer Nature journal article supplement (https://www.springermedizin.de/resource/supplementary/13075_2009_2775_MOESM7_ESM.pdf/9692858)

**A**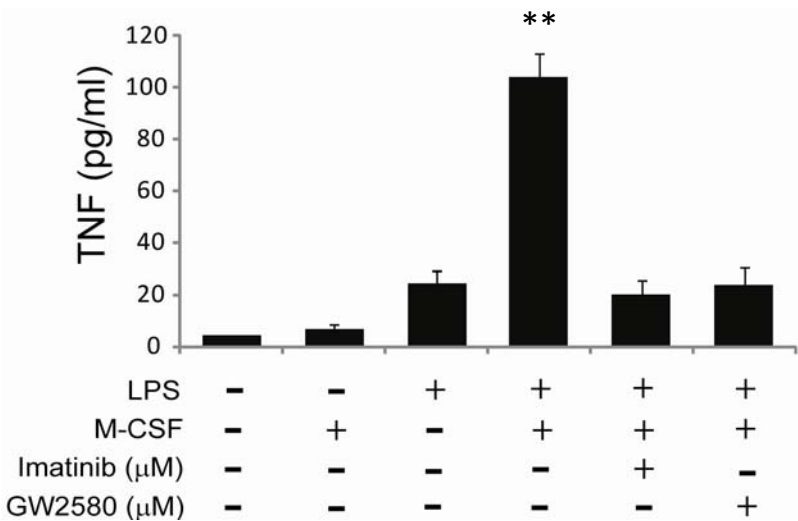**B**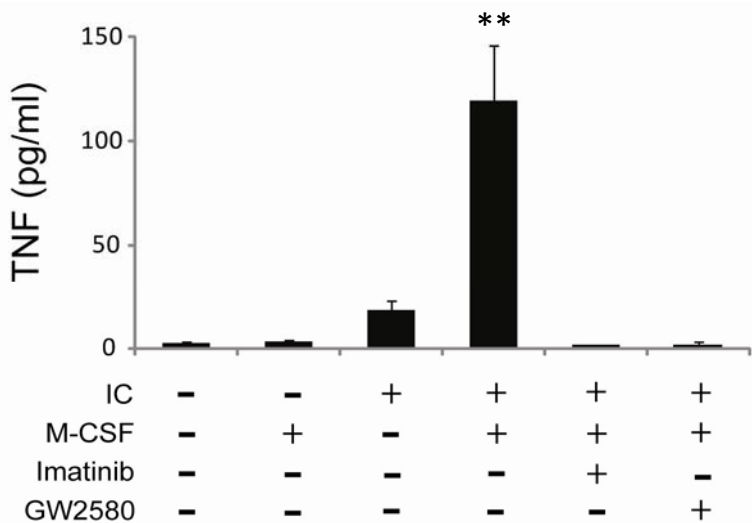

Supplement: MOESM7 [file 9692858]
